# Supplementary material for: Machine learning assistive rapid, label-free molecular phenotyping of blood with two-dimensional NMR correlational spectroscopy
Source: PubMed Central journal article supplement (PMC7522972; doi:10.1038/s42003-020-01262-z), 2020-09-28
Supplement: 42003_2020_1262_MOESM1_ESM.pdf [file 42003_2020_1262_MOESM1_ESM.pdf]

1 **Machine learning assisted rapid, label-free molecular phenotyping of blood with two-**  
2 **dimensional NMR correlational spectroscopy**

3 Weng Kung Peng<sup>1\*</sup>, Tian-Tsong Ng<sup>2</sup>, Tze Ping Loh<sup>3\*</sup>

4 <sup>1</sup>Precision Medicine – Engineering Group, International Iberian Nanotechnology Laboratory, 4715 330  
5 Braga - Portugal

6 <sup>2</sup>Institute for Infocomm Research, Fusionopolis Way, Singapore

7 <sup>3</sup>Department of Laboratory Medicine, National University Hospital, Singapore

8  
9  
10  
11  
12  
13  
14  
15  
16  
17  
18  
19  
20  
21  
22  
23  
24  
25  
26  
27  
28  
29  
30  
31  
32  
33  
34  
35  
36  
37  
38  
39  
40  
41  
42  
43

42 **Corresponding author:** W. K. Peng ([weng.kung@inl.int](mailto:weng.kung@inl.int)), T. P. Loh ([tze\\_ping\\_loh@nuhs.edu.sg](mailto:tze_ping_loh@nuhs.edu.sg))

1

**Supplementary Figures.**

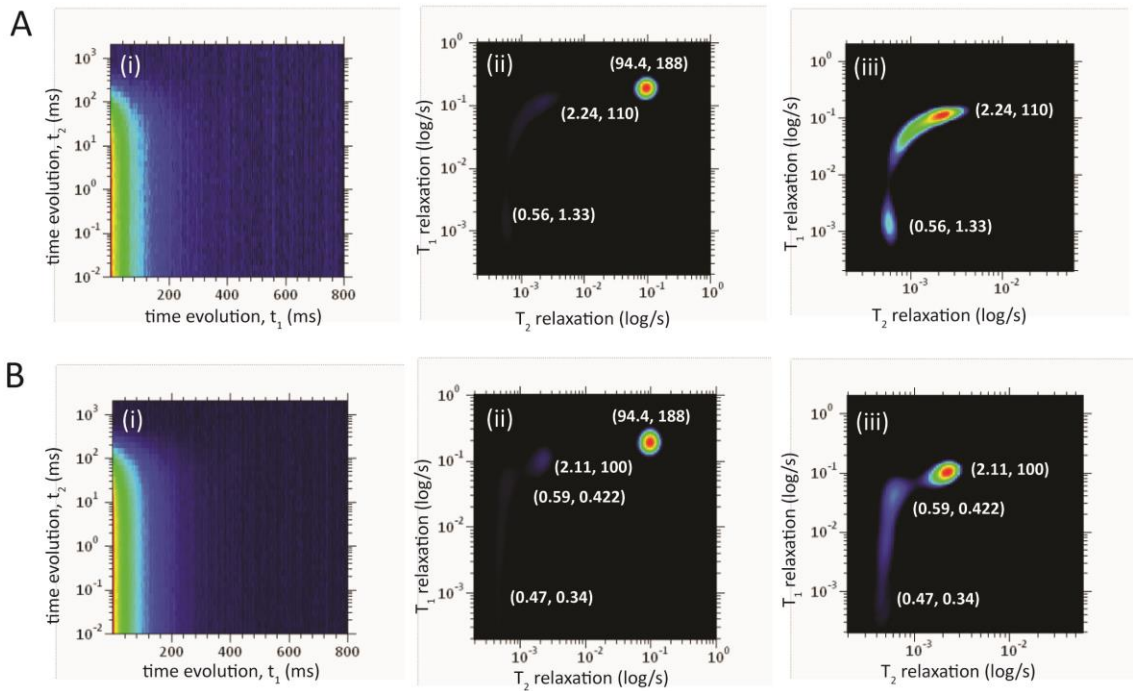

2

3 **Supplementary Figure 1.** Rapid signal acquisition and short spectra inversion time with (i) raw  
 4 echoes signal, (ii) Laplace inversion correlational map, and (iii) zoom-in details of fast relaxation  
 5 components (S-peak and T-peak). The echo time used were 200  $\mu$ s, number of echoes were 4000  
 6 echoes, and  $T_1$ -incremental were 40 (logarithmic) steps and the signal averaging were (a) 4 scans,  
 7 and (b) 16 scans. The total experiment times were (a) 6 minutes, and (b) 24 minutes, respectively.  
 8 The optimal SNR obtained is approximately 1600.

9

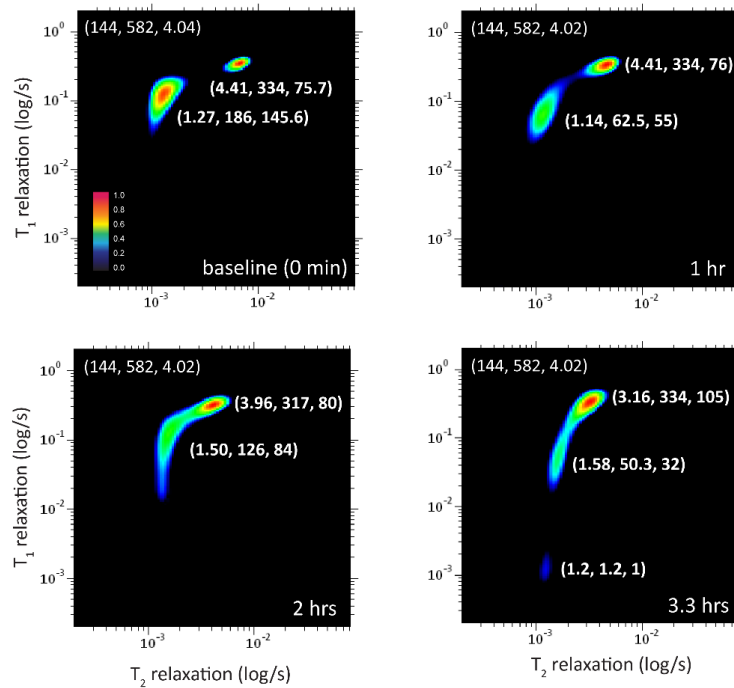

1  
 2  
 3  
 4  
 5  
 6  
 7  
 8  
 9  
 10  
 11  
 12

**Supplementary Figure 2.** Oxidative degradation of hemoglobin in *ex-vivo* condition. The zoom-in details of decomposed relaxation reservoirs for fast relaxation components (S-peak and T-peak), while the slow relaxation component (bulk water molecules, R-peak) is not shown. The coordinate for R-peak is indicated at upper left of the spectrum. The gradual degradation of hemoglobin correspond to the gradual increase of blood oxidation activities (met-Hb concentration). The micro MR measurements were carried out periodically at time-point as indicated above. Control baseline is indicated as '0 min' with hemoglobin in predominantly the oxygenated state. The coordinate is represented as ( $T_2$  relaxation (in ms),  $T_1$  relaxation (in ms), A-ratio (arb)).

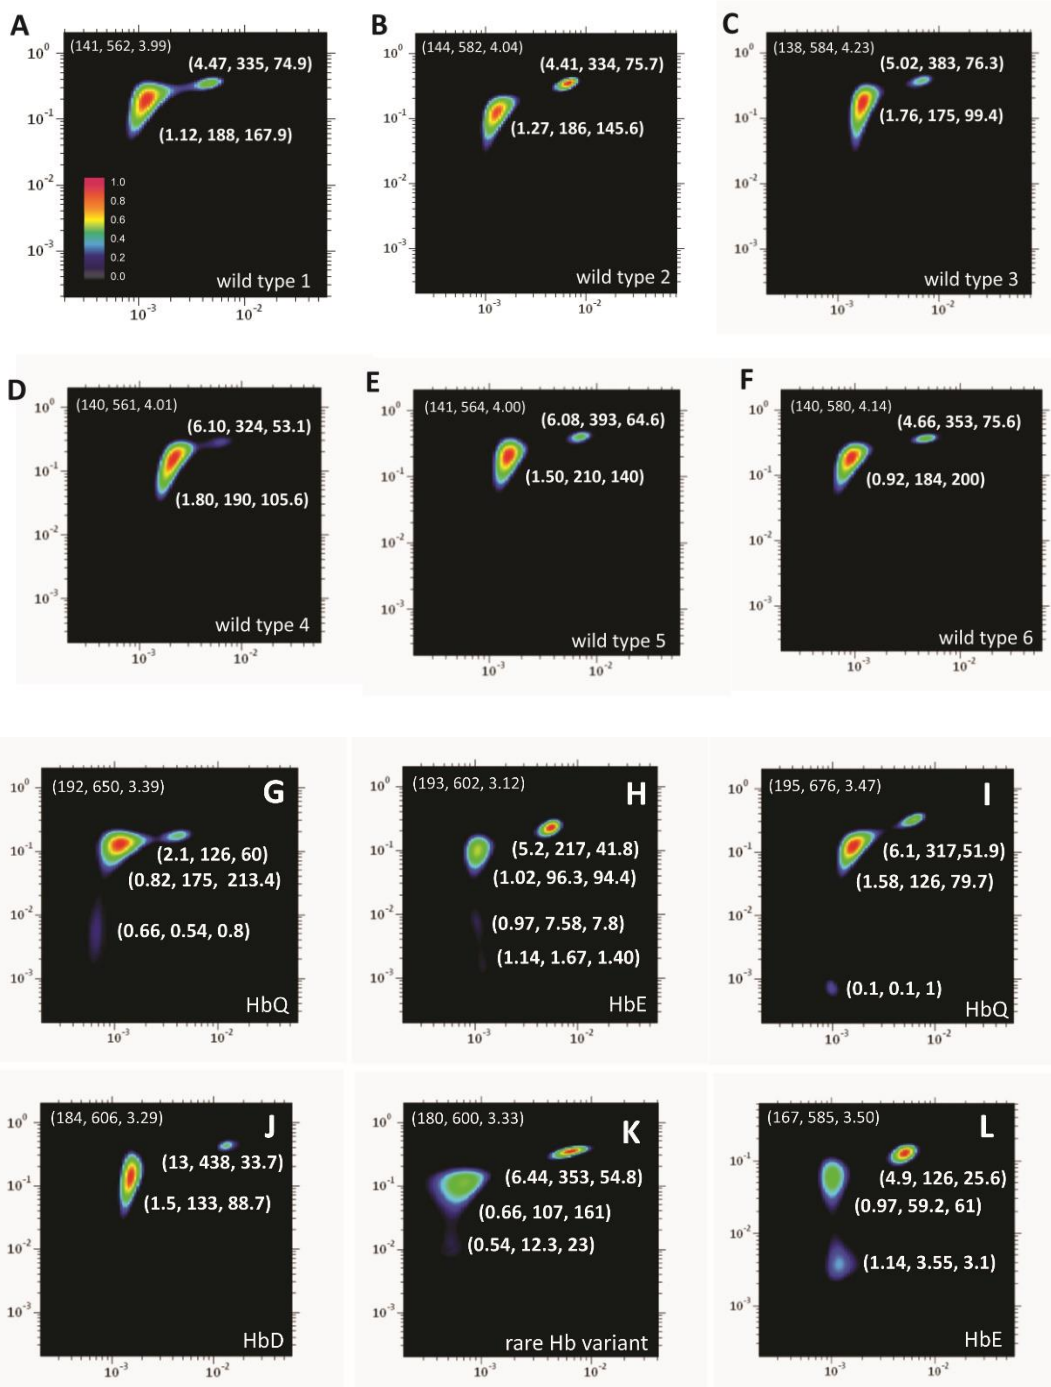

1

2

3 **Supplementary Figure 3.** (a) The  $T_1$ - $T_2$  correlational spectrum of blood microenvironment of  
 4 healthy normal hemoglobin (control) taken from six healthy donors (A to F), denoted as wild type  
 5 1 to wild type 6, and (b) Hb variants (G to L). The zoom-in details of decomposed relaxation  
 6 reservoirs for fast relaxation components (S-peak and T-peak), while the slow relaxation  
 7 component (bulk water molecules, R-peak) is not shown. The coordinate for R-peak is indicated  
 8 at upper left of the spectrum. The details of the coordinate is summarized in Supplementary Table  
 9 2.

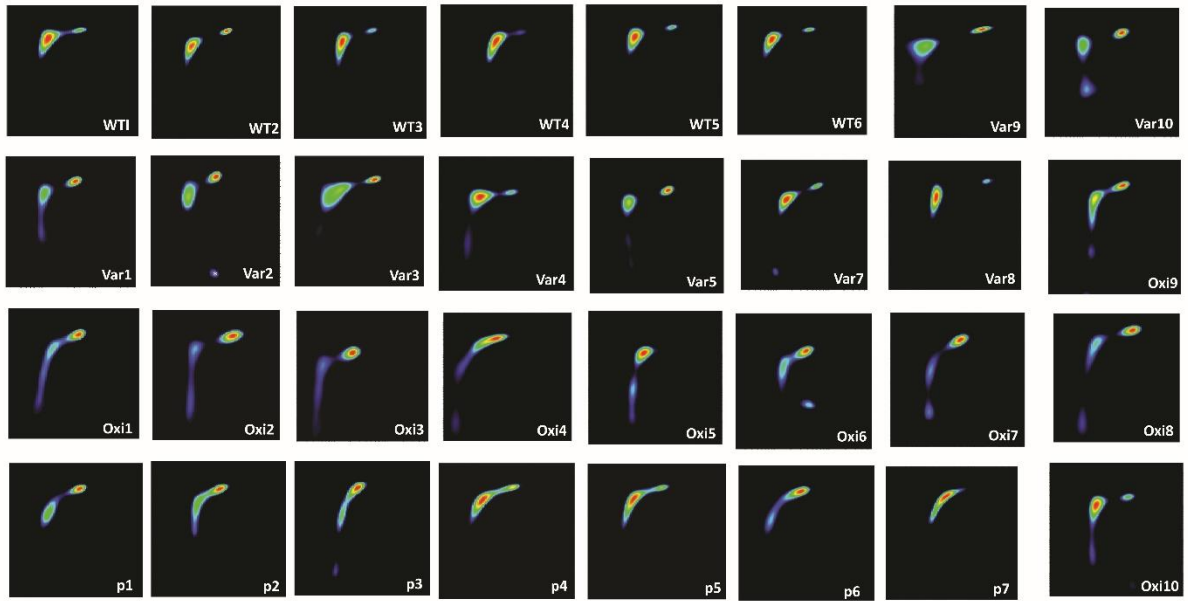

1

2 **Supplementary Figure 4.** The T<sub>1</sub>-T<sub>2</sub> correlational spectrum of blood microenvironment of 32  
3 anonymized subjects used for disease clustering and to evaluate blind test performance.

4

5

6

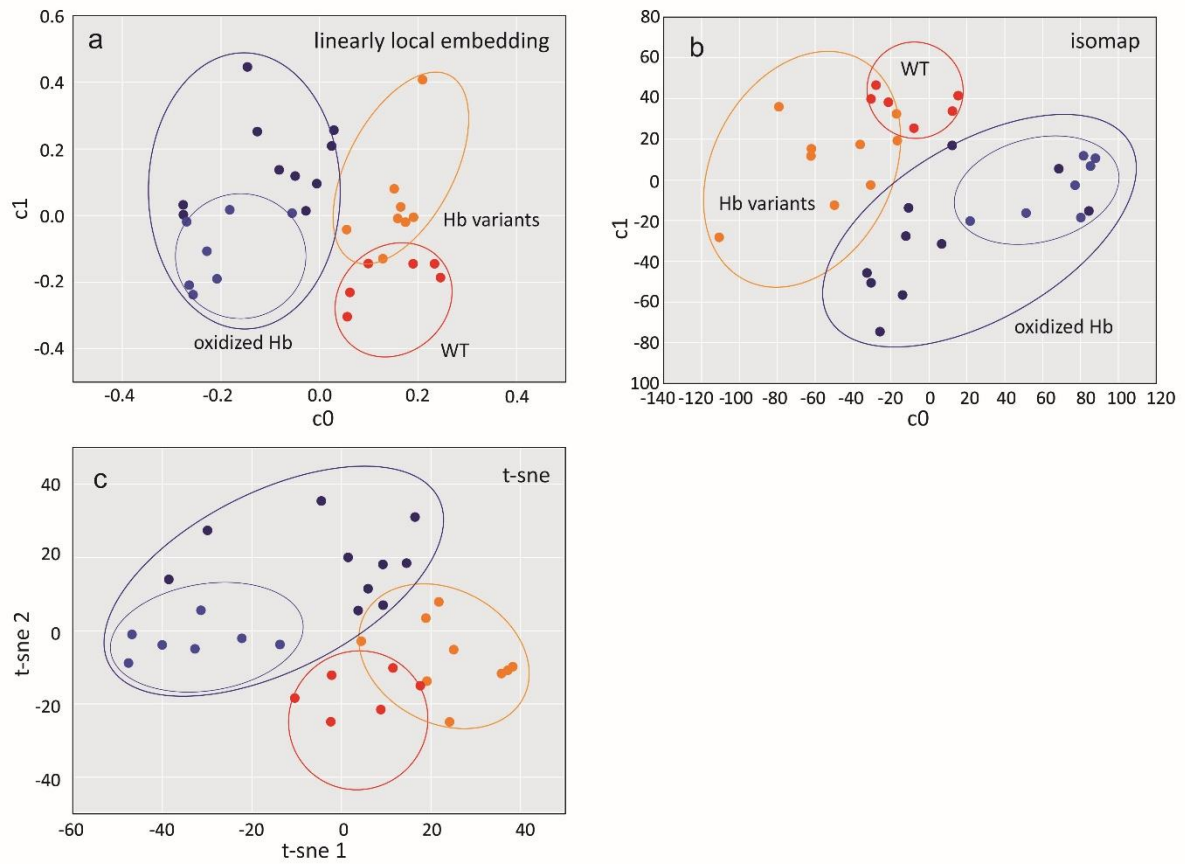

1

2 **Supplementary Figure 5.** Classification of two states (disease, non-disease, Hb variants) and  
3 disease subtyping (sub-type 1: oxidized Hb, sub-type 2: partially oxidized Hb) using (a) locally  
4 linear embedding technique (method: local, 25 neighbors, 200 max iterations), (b) Isomap  
5 technique (10 neighbors, 2 outputs components), (c) t-sne technique (60 perplexity, 12 early  
6 exaggeration, 200 learning rate, max iterations, 4 outputs components).

7

1

| image | Label    | Category | Obs 1 (M) | Obs 2 (J) | Obs 3 (M) | Obs 4 (Mn) | Obs 5 (T) |
|-------|----------|----------|-----------|-----------|-----------|------------|-----------|
| 1     | WT1      | healthy  | healthy   | healthy   | healthy   | healthy    | healthy   |
| 2     | WT2      | healthy  | disease   | healthy   | healthy   | healthy    | healthy   |
| 3     | WT3      | healthy  | healthy   | healthy   | healthy   | healthy    | healthy   |
| 4     | WT4      | healthy  | healthy   | healthy   | disease   | disease    | healthy   |
| 5     | WT5      | healthy  | healthy   | healthy   | healthy   | disease    | disease   |
| 6     | WT6      | healthy  | healthy   | disease   | disease   | disease    | healthy   |
| 7     | Hb Var 1 | disease  | disease   | disease   | disease   | disease    | disease   |
| 8     | Hb Var 2 | disease  | healthy   | healthy   | disease   | disease    | disease   |
| 9     | Hb Var 3 | disease  | disease   | disease   | disease   | disease    | disease   |
| 10    | Hb Var 4 | disease  | disease   | disease   | disease   | disease    | disease   |
| 11    | Hb Var 5 | disease  | disease   | disease   | disease   | disease    | disease   |
| 12    | Hb Var 6 | disease  | disease   | disease   | disease   | disease    | disease   |
| 13    | Hb Var 7 | disease  | disease   | disease   | disease   | disease    | disease   |
| 14    | Hb Var 8 | disease  | healthy   | healthy   | healthy   | healthy    | healthy   |
| 15    | Hb Var 9 | disease  | disease   | disease   | disease   | disease    | disease   |
| 16    | Oxi Hb   | disease  | disease   | disease   | disease   | disease    | disease   |
| 17    | Oxi Hb   | disease  | disease   | disease   | disease   | disease    | disease   |
| 18    | Oxi Hb   | disease  | disease   | disease   | disease   | disease    | disease   |
| 19    | Oxi Hb   | disease  | disease   | healthy   | disease   | disease    | disease   |
| 20    | Oxi Hb   | disease  | disease   | disease   | disease   | disease    | disease   |
| 21    | Oxi Hb   | disease  | disease   | disease   | disease   | disease    | healthy   |
| 22    | Oxi Hb   | disease  | healthy   | healthy   | healthy   | disease    | healthy   |
| 23    | Oxi Hb   | disease  | healthy   | healthy   | disease   | healthy    | disease   |
| 24    | Oxi Hb   | disease  | disease   | disease   | disease   | disease    | disease   |
| 25    | Oxi Hb   | disease  | disease   | disease   | disease   | disease    | disease   |
| 26    | Oxi Hb   | disease  | disease   | disease   | disease   | disease    | disease   |
| 27    | Oxi Hb   | disease  | disease   | disease   | disease   | disease    | disease   |
| 28    | Oxi Hb   | disease  | disease   | disease   | disease   | disease    | disease   |
| 29    | Oxi Hb   | disease  | healthy   | healthy   | disease   | healthy    | healthy   |
| 30    | Oxi Hb   | disease  | healthy   | healthy   | healthy   | healthy    | healthy   |
| 31    | Oxi Hb   | disease  | disease   | disease   | disease   | disease    | disease   |
| 32    | Oxi Hb   | disease  | disease   | disease   | disease   | disease    | disease   |

2

3 **Supplementary Figure 6a.** The details of the blind test; (a) human classification and (b)  
4 performance. The terminology used were True Positive (TP), True Negative (TN), False Positive  
5 (FP), and False Negative (FN).

6

7

|             | image                   | Obs 1 (M) | Obs 2 (J) | Obs 3 (M) | Obs 4 (Mn) | Obs (T) |
|-------------|-------------------------|-----------|-----------|-----------|------------|---------|
|             | 1                       | TN        | TN        | TN        | TN         | TN      |
|             | 2                       | FP        | TN        | TN        | TN         | TN      |
|             | 3                       | TN        | TN        | TN        | TN         | TN      |
|             | 4                       | TN        | TN        | FP        | FP         | TN      |
|             | 5                       | TN        | TN        | TN        | FP         | FP      |
|             | 6                       | TP        | FP        | FP        | FP         | TP      |
|             | 7                       | TP        | TP        | TP        | TP         | TP      |
|             | 8                       | FN        | FN        | TP        | TP         | TP      |
|             | 9                       | TP        | TP        | TP        | TP         | TP      |
|             | 10                      | TP        | TP        | TP        | TP         | TP      |
|             | 11                      | TP        | TP        | TP        | TP         | TP      |
|             | 12                      | TP        | TP        | TP        | TP         | TP      |
|             | 13                      | TP        | TP        | TP        | TP         | TP      |
|             | 14                      | FN        | FN        | FN        | FN         | FN      |
|             | 15                      | TP        | TP        | TP        | TP         | TP      |
|             | 16                      | TP        | TP        | TP        | TP         | TP      |
|             | 17                      | TP        | TP        | TP        | TP         | TP      |
|             | 18                      | TP        | TP        | TP        | TP         | TP      |
|             | 19                      | TP        | FN        | TP        | TP         | TP      |
|             | 20                      | TP        | TP        | TP        | TP         | TP      |
|             | 21                      | TP        | TP        | TP        | TP         | FN      |
|             | 22                      | FN        | FN        | FN        | TP         | FN      |
|             | 23                      | FN        | FN        | TP        | FN         | TP      |
|             | 24                      | TP        | TP        | TP        | TP         | TP      |
|             | 25                      | TP        | TP        | TP        | TP         | TP      |
|             | 26                      | TP        | TP        | TP        | TP         | TP      |
|             | 27                      | TP        | TP        | TP        | TP         | TP      |
|             | 28                      | TP        | TP        | TP        | TP         | TP      |
|             | 29                      | FN        | FN        | FN        | TP         | FN      |
|             | 30                      | FN        | FN        | FN        | FN         | FN      |
|             | 31                      | TP        | TP        | TP        | TP         | TP      |
|             | 32                      | TP        | TP        | TP        | TP         | TP      |
|             |                         |           |           |           |            |         |
|             | TP                      | 21        | 19        | 22        | 23         | 22      |
|             | FP                      | 1         | 1         | 2         | 3          | 1       |
|             | TN                      | 4         | 5         | 4         | 3          | 4       |
|             | FN                      | 6         | 7         | 4         | 3          | 5       |
|             | Total                   | 32        | 32        | 32        | 32         | 32      |
| Sensitivity | $TP / (TP + FN)$        | 0.78      | 0.73      | 0.85      | 0.88       | 0.81    |
| Specificity | $TN / (FP + TN)$        | 0.80      | 0.83      | 0.67      | 0.50       | 0.80    |
| Precision   | $TP / (TP + FP)$        | 0.95      | 0.95      | 0.92      | 0.88       | 0.96    |
| F1 score    | $2TP / (2TP + FN + FP)$ | 0.86      | 0.83      | 0.88      | 0.88       | 0.88    |
| ACC         | $(TP + TN) / (all)$     | 0.78      | 0.75      | 0.81      | 0.81       | 0.81    |

1

2 **Supplementary Figure 6b.** The details of the blind test. The terminology used were True Positive  
3 (TP), True Negative (TN), False Positive (FP), and False Negative (FN).



1

| k=2                  | AUC   | CA    | Sensitivity | Specificity | Precision | F1    |
|----------------------|-------|-------|-------------|-------------|-----------|-------|
| neural network       | 0.987 | 0.812 | 0.812       | 1           | 0.906     | 0.832 |
| kNN                  | 0.885 | 0.875 | 0.875       | 0.67        | 0.875     | 0.875 |
| logistic regression  | 0.897 | 0.812 | 0.812       | 0.5         | 0.812     | 0.812 |
| naïve bayes          | 0.5   | 0.188 | 0.188       | 1           | 0.035     | 0.059 |
| average              | 0.817 | 0.672 | 0.672       | 0.793       | 0.657     | 0.645 |
|                      |       |       |             |             |           |       |
| k=3                  | AUC   | CA    | Sensitivity | Specificity | Precision | F1    |
| neural network       | 0.958 | 0.844 | 0.875       | 1           | 0.925     | 0.885 |
| kNN                  | 0.896 | 0.812 | 0.812       | 0.67        | 0.839     | 0.822 |
| logistic regression  | 0.963 | 0.906 | 0.906       | 0.83        | 0.914     | 0.909 |
| naïve bayes          | 0.595 | 0.344 | 0.344       | 1           | 0.854     | 0.33  |
| average              | 0.853 | 0.727 | 0.734       | 0.874       | 0.883     | 0.737 |
|                      |       |       |             |             |           |       |
| k=5                  | AUC   | CA    | Sensitivity | Specificity | Precision | F1    |
| neural network       | 0.92  | 0.906 | 0.906       | 1           | 0.938     | 0.913 |
| kNN                  | 0.912 | 0.844 | 0.844       | 0.83        | 0.881     | 0.855 |
| logistic regression  | 0.927 | 0.906 | 0.906       | 0.83        | 0.914     | 0.909 |
| naïve bayes          | 0.697 | 0.406 | 0.406       | 1           | 0.858     | 0.417 |
| average              | 0.864 | 0.766 | 0.766       | 0.915       | 0.898     | 0.774 |
|                      |       |       |             |             |           |       |
| leave one-out method | AUC   | CA    | Sensitivity | Specificity | Precision | F1    |
| neural network       | 0.994 | 0.875 | 0.875       | 1           | 0.925     | 0.885 |
| kNN                  | 0.936 | 0.875 | 0.875       | 1           | 0.925     | 0.885 |
| logistic regression  | 0.917 | 0.906 | 0.906       | 0.83        | 0.914     | 0.909 |
| naïve bayes          | 0.788 | 0.562 | 0.562       | 1           | 0.869     | 0.6   |
| average              | 0.909 | 0.805 | 0.805       | 0.958       | 0.908     | 0.820 |

2

3

4 **Supplementary Figure 7.** The details of the supervised learning performance using various k-  
5 fold cross validation sampling (e.g., k=2, k=3, and k=5), and leave-one-out methods, respectively.  
6 The performance of the naïve Bayes model was found to be unsuitable for this study, if the k-fold  
7 sampling is small (e.g., k<5).

8

1 **Supplementary Table**

2

| reference            | immuno-<br>labelling | disease                  | POCT | AI-<br>assisted | Time to<br>results | info |
|----------------------|----------------------|--------------------------|------|-----------------|--------------------|------|
| <i>this work</i>     | label-free           | hemoglobinopathies       | Yes  | Yes             | min                | 2D   |
| Peng <sup>7-10</sup> | label-free           | malaria screening        | Yes  | No              | min                | 1D   |
| Lee <sup>11</sup>    | label-based          | bacteria detection       | Yes  | No              | min to hour        | 1D   |
| Haun <sup>12</sup>   | label-based          | cancer (breast)          | Yes  | No              | min to hour        | 1D   |
| Haun <sup>13</sup>   | label-based          | cancer (intra-abdominal) | Yes  | No              | min to hour        | 1D   |
| Liong <sup>14</sup>  | label-based          | M. Tuberculosis          | Yes  | No              | min to hour        | 1D   |
| Chung <sup>15</sup>  | label-based          | bacteria detection       | Yes  | No              | min to hour        | 1D   |
| Gee <sup>16</sup>    | label-based          | cancer (melanoma)        | Yes  | No              | min to hour        | 1D   |
| Lei <sup>17</sup>    | label-based          | bacteria detection       | Yes  | No              | min to hour        | 1D   |
| Ha <sup>18</sup>     | not related          | no information           | Yes  | No              | min                | 2D   |

3

4 **Supplementary Table 1.** Summary of recently developed NMR-based POCT technologies which  
5 uses time-domain signal (or known as relaxometry), and its' salient features. The terminology  
6 used were min = minutes, hr = hour.

7

| Bulk water, R-peak     | relaxation time (ms) |                     |         | <i>(P-value)</i>    |                     |
|------------------------|----------------------|---------------------|---------|---------------------|---------------------|
|                        | T <sub>1</sub> (ms)  | T <sub>2</sub> (ms) | A ratio | T <sub>1</sub> (ms) | T <sub>2</sub> (ms) |
| Hb wild type (control) | 562                  | 141                 | 3.99    | 0.0004              | 0.00004             |
| Hb wild type (control) | 582                  | 144                 | 4.04    | <b>P&lt;0.0005</b>  | <b>P&lt;0.0005</b>  |
| Hb wild type (control) | 584                  | 138                 | 4.23    |                     |                     |
| Hb wild type (control) | 561                  | 140                 | 4.01    |                     |                     |
| Hb wild type (control) | 564                  | 141                 | 4.00    |                     |                     |
| Hb wild type (control) | 580                  | 140                 | 4.14    |                     |                     |
| HbE variant            | 631                  | 158                 | 3.99    |                     |                     |
| HbD variant            | 640                  | 165                 | 3.88    |                     |                     |
| rare Hb variant        | 640                  | 165                 | 3.88    |                     |                     |
| HbE variant            | 602                  | 193                 | 3.12    |                     |                     |
| HbE variant            | 585                  | 167                 | 3.50    |                     |                     |
| rare Hb variant        | 600                  | 180                 | 3.33    |                     |                     |
| HbD variant            | 606                  | 184                 | 3.29    |                     |                     |
| HbQ                    | 676                  | 195                 | 3.47    |                     |                     |
| HbQ                    | 650                  | 192                 | 3.39    |                     |                     |

1

| Hydration layer, S-peak | relaxation time (ms) |                     |         | <i>(P-value)</i>    |                     |
|-------------------------|----------------------|---------------------|---------|---------------------|---------------------|
|                         | T <sub>1</sub> (ms)  | T <sub>2</sub> (ms) | A ratio | T <sub>1</sub> (ms) | T <sub>2</sub> (ms) |
| Hb wild type (control)  | 335                  | 4.47                | 74.94   | 0.16                | 0.49                |
| Hb wild type (control)  | 334                  | 4.41                | 75.74   | <b>P&lt;0.5</b>     | <b>P&lt;0.5</b>     |
| Hb wild type (control)  | 383                  | 5.02                | 76.29   |                     |                     |
| Hb wild type (control)  | 324                  | 6.10                | 53.11   |                     |                     |
| Hb wild type (control)  | 393                  | 6.08                | 64.64   |                     |                     |
| Hb wild type (control)  | 353                  | 4.66                | 75.75   |                     |                     |
| HbE variant             | 335                  | 4.42                | 75.79   |                     |                     |
| HbD variant             | 373                  | 4.18                | 89.23   |                     |                     |
| rare Hb variant         | 362                  | 6.48                | 55.86   |                     |                     |
| HbE variant             | 217                  | 5.2                 | 41.73   |                     |                     |
| HbE variant             | 126                  | 4.9                 | 25.71   |                     |                     |
| rare Hb variant         | 353                  | 6.44                | 54.81   |                     |                     |
| HbD variant             | 438                  | 13                  | 33.69   |                     |                     |
| HbQ                     | 317                  | 6.1                 | 51.97   |                     |                     |
| HbQ                     | 126                  | 2.1                 | 60.00   |                     |                     |

2

3

4

| Direct bound, T-peak   | relaxation time (ms) |                     |         | <i>(P-value)</i>    |                     |
|------------------------|----------------------|---------------------|---------|---------------------|---------------------|
|                        | T <sub>1</sub> (ms)  | T <sub>2</sub> (ms) | A ratio | T <sub>1</sub> (ms) | T <sub>2</sub> (ms) |
| Hb wild type (control) | 188.00               | 1.12                | 167.9   | 0.0004              | 0.17                |
| Hb wild type (control) | 186.00               | 1.27                | 146.5   | <b>P&lt;0.0005</b>  | <b>P~0.15</b>       |
| Hb wild type (control) | 175.00               | 1.76                | 99.4    |                     |                     |
| Hb wild type (control) | 190.00               | 1.80                | 105.6   |                     |                     |
| Hb wild type (control) | 210                  | 1.5                 | 140.0   |                     |                     |
| Hb wild type (control) | 184                  | 0.92                | 200.0   |                     |                     |
| HbE variant            | 106                  | 1.06                | 100.0   |                     |                     |
| HbD variant            | 96.3                 | 1.20                | 80.3    |                     |                     |
| rare Hb variant        | 172                  | 1.40                | 122.9   |                     |                     |
| HbE variant            | 96.3                 | 1.02                | 94.4    |                     |                     |
| HbE variant            | 59.2                 | 0.97                | 61.0    |                     |                     |
| rare Hb variant        | 107                  | 0.66                | 162.1   |                     |                     |
| HbD variant            | 133                  | 1.5                 | 88.7    |                     |                     |
| HbQ                    | 126                  | 1.58                | 79.7    |                     |                     |
| HbQ                    | 175                  | 0.82                | 213.4   |                     |                     |

1

2 **Supplementary Table 2.** The summary of T<sub>1</sub> relaxations and T<sub>2</sub> relaxations (for R-peak, S-peak  
3 and T-peak) of the healthy normal hemoglobin (wild-tpye) as compared to other hemoglobin  
4 variants. The (R-peaks, T-peaks) were statistically significant ( $P<0.05$ ), while S-peaks were not  
5 statistically significant from the controls (wild type). The two-tailed Student's T-test was used to  
6 calculate the  $P$ -value.

7

1  
2  
3  
4  
5  
6  
7  
8  
9  
10  
11  
12  
13  
14  
15  
16  
17  
18  
19  
20  
21  
22  
23  
24  
25  
26  
27  
28  
29  
30  
31  
32  
33  
34  
35  
36  
37  
38  
39  
40  
41  
42  
43

## Supplementary Discussion.

**Rapid signal acquisition and spectral inversion time.** One of the biggest challenge in implementation of multidimensional inverse Laplace correlational spectroscopy is the undesirable long experiment time (e.g., signal acquisition time) and long post processing time (e.g., Laplace inversion time)<sup>1,2</sup>. The long signal acquisition is inherently due to the long dephasing time (typically a few seconds for liquid NMR) and low signal to noise ratio (SNR).

In this work, however, we used red blood cells (RBCs) which has semi solid structure as our target sample and the proton nuclei of RBCs under observation had relatively short transverse relaxation time (less than 200 ms) shorter than free water (2.5 sec). For each acquisition, more than 20 folds of experimental time has been shortened, and for an entire 2D NMR experiment (with e.g., 24 acquisition), more than 400 folds of experimental time has been shortened.

In order to evaluate the quality of the raw echoes signal acquired and the Laplace inversion correlational map, we carried out two successive acquisitions on freshly prepared met-Hb (refer to Methods Online), using (a) 4 scans and (b) 16 scans (Supplementary Fig. 1) as signal averaging. The total acquisition time taken were 6 minutes and 24 minutes, for 4 and 16 scans, respectively. The SNR would improve but at the expenses of acquisition time. The 2D correlation maps were processed using built-in ILT algorithm (FISTA inversion<sup>3</sup>, KEA built in-function) method with 5000 iterations, and smoothing parameter of 1 were used to produce a 200 x 200 steps correlational map. The inversion typically completed in less than 1 minute using a desktop computer (Intel Core Pentium i3 CPU @ 3.2GHz, 1.74Gb RAM).

We observed that the bulk water molecules main peaks and two other short relaxation peaks (sub-ms) were reproduced in both cases. Furthermore, the bulk water molecules peaks coordinate were ( $T_2=94.4\text{ms}$ ,  $T_1=188\text{ms}$ ) retained (Supplementary Fig. 1A (ii) - 1B (ii)). As for short relaxation peaks (sub-ms), there were minor shift (Supplementary Fig. 1A (iii) - 1B (iii)), as the experiments were performed sequentially. The minor shift is to be expected as the cells' biologic evolved over time, in particularly in the case of hemoglobin oxidation. Essentially, important feature were clearly retained in these two successive acquisition. The RBCs sample used in this work has much shorter dephasing time (less than 200ms), and with the 4 signal averaging scans (Supplementary Fig. 1a), sufficiently high SNR was recorded in less than 6 minutes of total experiment time. The Laplace inversion time completes in less than 2 minutes.

In conclusion, it is demonstrated that the combined signal acquisition and Laplace inversion time shortened to minutes, thus paving way for the possibility of rapid molecular phenotyping at point-of-care setting. In addition, with the recent availability of ultrafast signal acquisition methods<sup>2,4</sup> and efficient inversion algorithm<sup>1,5</sup>, real-time characterization and monitoring may be feasible<sup>6</sup>.

**Oxidative degradation of hemoglobin.** The whole blood were exposed to mild oxidant of 0.01 mM of sodium nitrite were exposed for 10 minutes and the reaction were quenched by washing the sample three times with PBS, resuspend in PBS, and spun down (6000g, 1 min) using a microcapillary tubes meant for NMR measurements. The 2D correlational spectrum were taken sequentially a over period of 3.3 hours to observe the hemoglobin degradation process (Supplementary Fig. 2). The fast relaxation components (T-peak) dropped to ( $T_2=1.14\text{ms}$ ,  $T_1=62.5\text{ms}$ ) from its' original state ( $T_2=1.27\text{ms}$ ,  $T_1=186\text{ms}$ ), indicating that a significant amount

1 of oxidation had taken place over a period of one hour. A small sub-population of the red blood  
2 cells continued to be oxidized, causing the formation of  $T_1$ -relaxation stretching (2 hrs), which  
3 accumulated continuously (3.3 hrs). A subpopulation of the hemoglobin, which were most likely  
4 due to the aged red blood cells with depleted anti-oxidant capacity, continued to be locked in the  
5 oxidized state, forming the signature  $T_1$  relaxation stretching ending at peak ( $T_2=1.2\text{ms}$ ,  
6  $T_1=1.2\text{ms}$ ) 3.3 hrs. It is worth noting that the process of oxidation and reduction is a dynamic  
7 process, and this process is mediated by the presence of anti oxidant (e.g., glutathione) which  
8 act as buffer for recovery process. This is an unique and personalized features which can be  
9 exploited for personalized medicine (e.g., drug screening).

10



1 References

- 2 1. Song, Y.-Q. *et al.* T1–T2 Correlation Spectra Obtained Using a Fast Two-Dimensional Laplace  
 3 Inversion. *J. Magn. Reson.* **154**, 261–268 (2002).
- 4 2. Ahola, S. & Telkki, V.-V. Ultrafast Two-Dimensional NMR Relaxometry for Investigating  
 5 Molecular Processes in Real Time. *ChemPhysChem* **15**, 1687–1692 (2014).
- 6 3. Zhou, X., Su, G., Wang, L., Nie, S. & Ge, X. The inversion of 2D NMR relaxometry data using L1  
 7 regularization. *J. Magn. Reson.* **275**, 46–54 (2017).
- 8 4. Ahola, S. *et al.* Ultrafast multidimensional Laplace NMR for a rapid and sensitive chemical  
 9 analysis. *Nat. Commun.* **6**, (2015).
- 10 5. Song, Y.-Q., Ryu, S. & Sen, P. N. Determining multiple length scales in rocks. *Nature* **406**, 178–  
 11 181 (2000).
- 12 6. Peng, W. K. & Paesani, D. Omics Meeting Onics: Towards the Next Generation of Spectroscopic-  
 13 Based Technologies in Personalized Medicine. *J. Pers. Med.* **9**, 39 (2019).
- 14 7. Peng, W. K. *et al.* Micromagnetic resonance relaxometry for rapid label-free malaria diagnosis.  
 15 *Nat. Med.* **20**, 1069–1073 (2014).
- 16 8. Han, J. & Peng, W. K. Reply to ‘Considerations regarding the micromagnetic resonance  
 17 relaxometry technique for rapid label-free malaria diagnosis’. *Nat. Med.* **21**, 1387–1389  
 18 (2015).
- 19 9. Dupré, A., Lei, K.-M., Mak, P.-I., Martins, R. P. & Peng, W. K. Micro- and nanofabrication NMR  
 20 technologies for point-of-care medical applications – A review. *Microelectron. Eng.* **209**, 66–74  
 21 (2019).
- 22 10. Veiga, M. I. & Peng, W. K. Rapid phenotyping towards personalized malaria medicine.  
 23 *Malar. J.* **19**, 68 (2020).
- 24 11. Lee, H., Sun, E., Ham, D. & Weissleder, R. Chip–NMR biosensor for detection and molecular  
 25 analysis of cells. *Nat. Med.* **14**, 869–874 (2008).
- 26 12. Haun, J. B., Devaraj, N. K., Hilderbrand, S. A., Lee, H. & Weissleder, R. Bioorthogonal  
 27 chemistry amplifies nanoparticle binding and enhances the sensitivity of cell detection. *Nat.*  
 28 *Nanotechnol.* **5**, 660–665 (2010).
- 29 13. Haun, J. B. *et al.* Micro-NMR for Rapid Molecular Analysis of Human Tumor Samples. *Sci.*  
 30 *Transl. Med.* **3**, 71ra16-71ra16 (2011).
- 31 14. Liong, M. *et al.* Magnetic barcode assay for genetic detection of pathogens. *Nat. Commun.*  
 32 **4**, 55–65 (2013).
- 33 15. Chung, H. J., Castro, C. M., Im, H., Lee, H. & Weissleder, R. A magneto-DNA nanoparticle  
 34 system for rapid detection and phenotyping of bacteria. *Nat. Nanotechnol.* **8**, 369–375 (2013).
- 35 16. Gee, M. S. *et al.* Point of care assessment of melanoma tumor signaling and metastatic  
 36 burden from  $\mu$ NMR analysis of tumor fine needle aspirates and peripheral blood.  
 37 *Nanomedicine Nanotechnol. Biol. Med.* **13**, 821–828 (2017).
- 38 17. Lei, K.-M., Mak, P.-I., Law, M.-K. & Martins, R. P. CMOS biosensors for in vitro diagnosis –  
 39 transducing mechanisms and applications. *Lab. Chip* **16**, 3664–3681 (2016).
- 40 18. Ha, D., Paulsen, J., Sun, N., Song, Y.-Q. & Ham, D. Scalable NMR spectroscopy with  
 41 semiconductor chips. *Proc. Natl. Acad. Sci.* **111**, 11955–11960 (2014).
- 42
